# Supplementary material
Source: PubMed Central journal article supplement (PMC6891201)

# Supplementary Figure 1

**A**

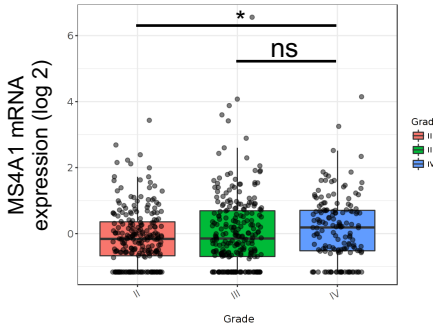

**B**

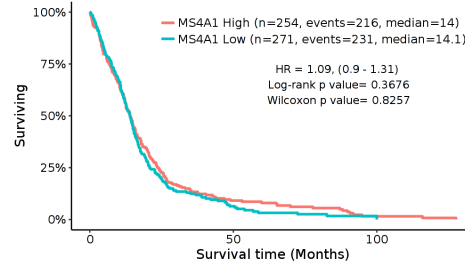

**C**

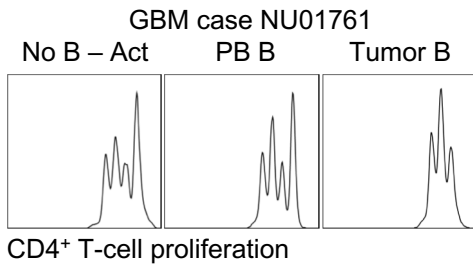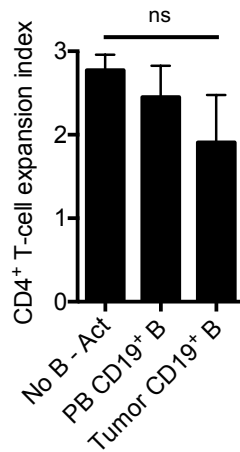

**D**

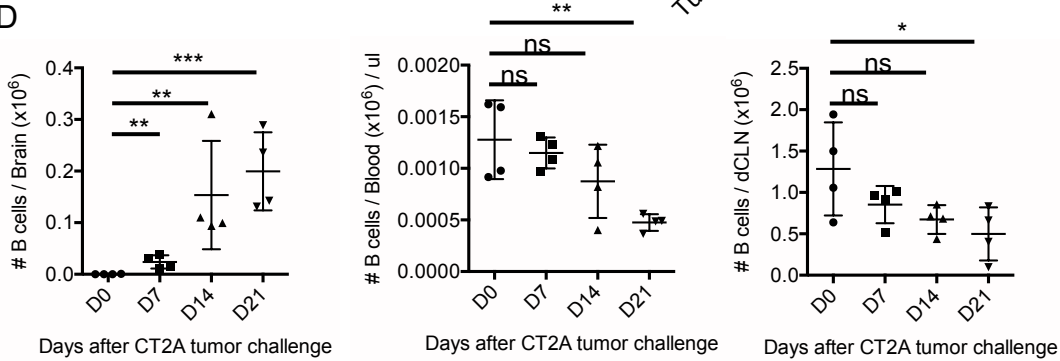

**E**

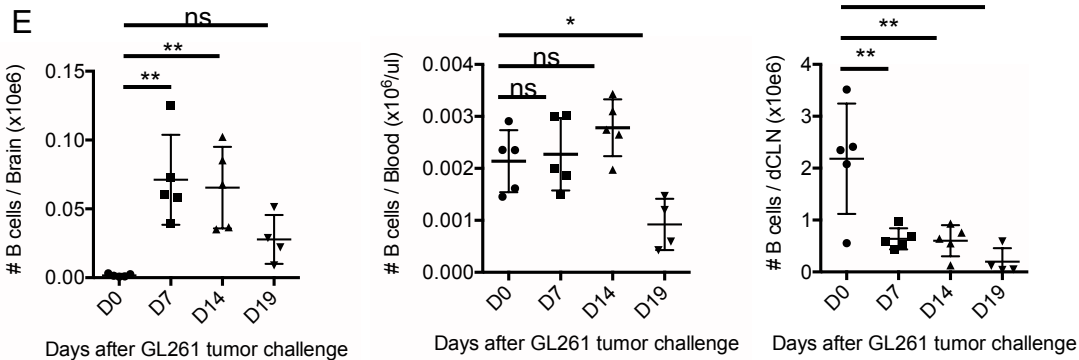

# Supplementary Figure 2

A

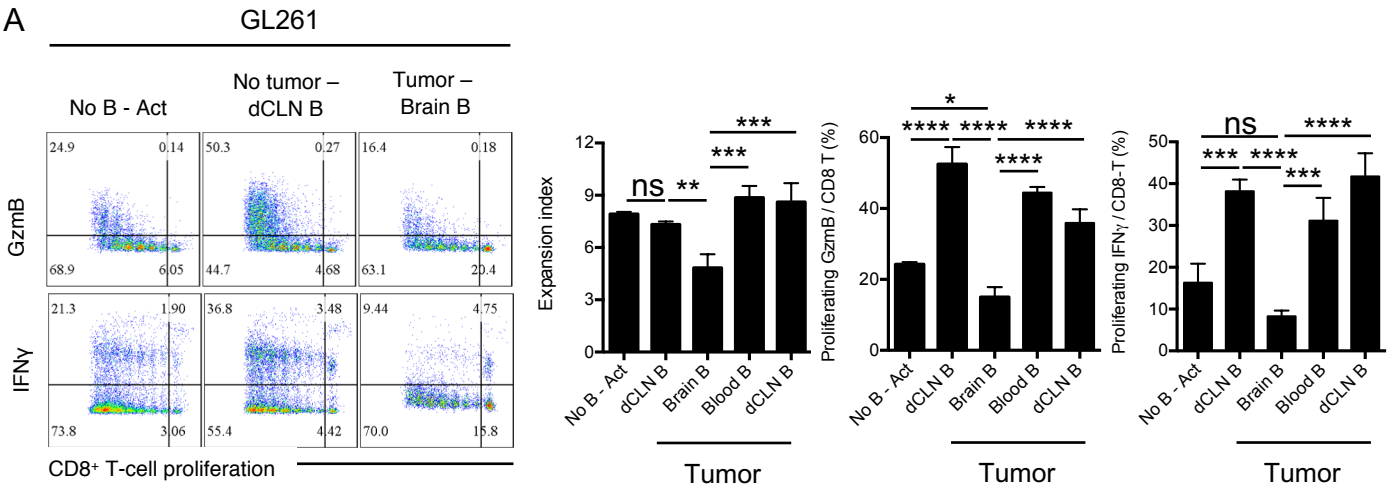

B

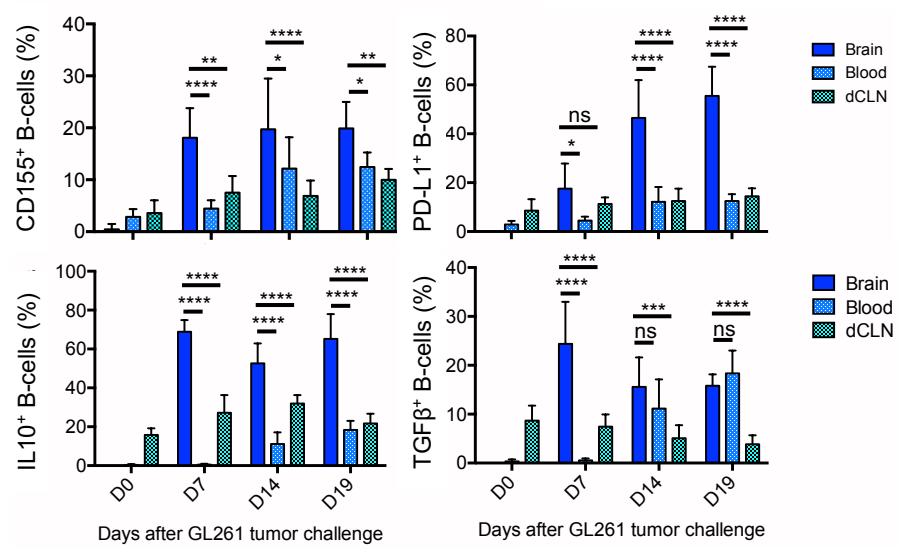

# Supplementary Figure 3

A

## Intracranial anti-CD20 injection

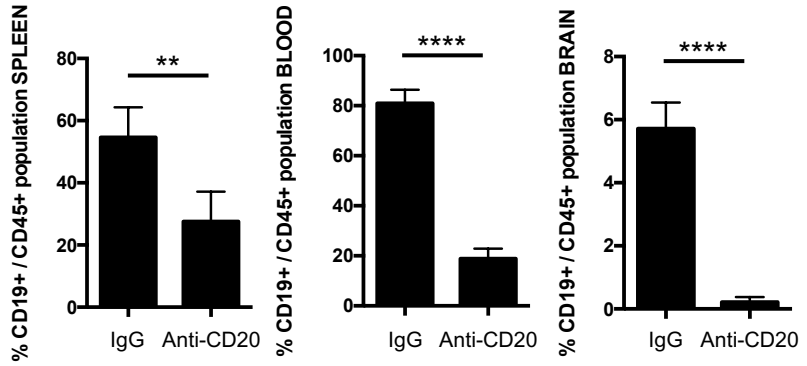

B

## Intraperitoneal anti-CD20 injection

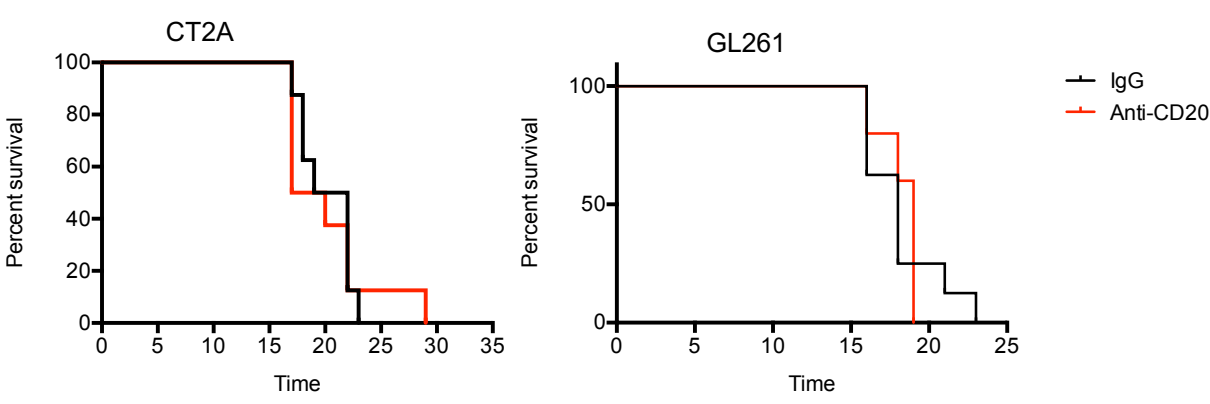

C

## Intraperitoneal anti-CD20 injection

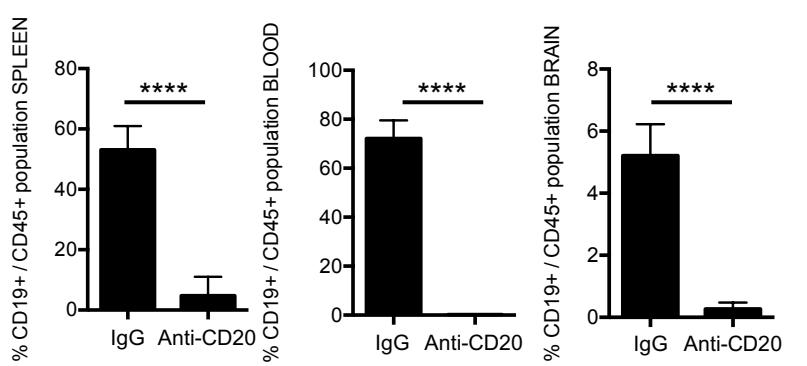

# Supplementary Figure 4

**A**

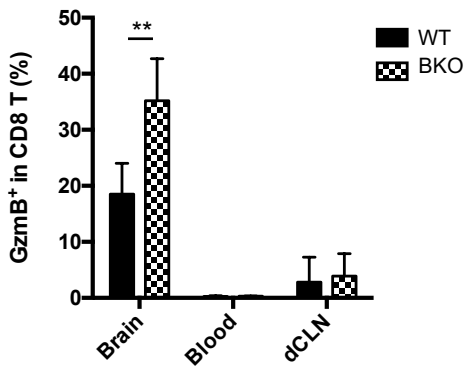

**B**

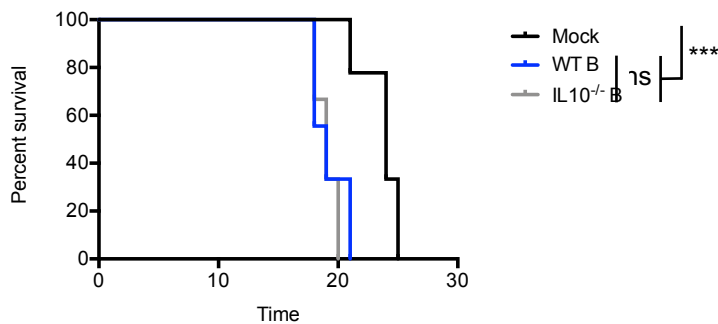

**C**

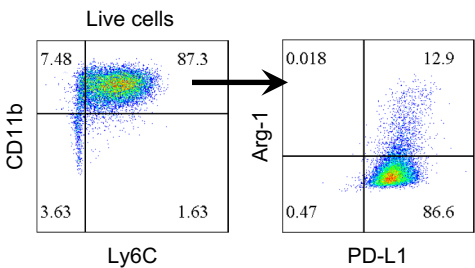

**D**

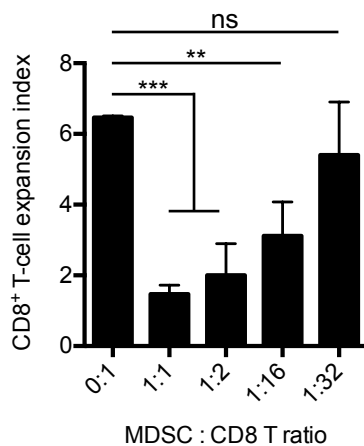

**E**

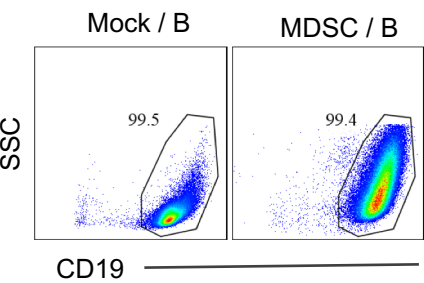

**F**

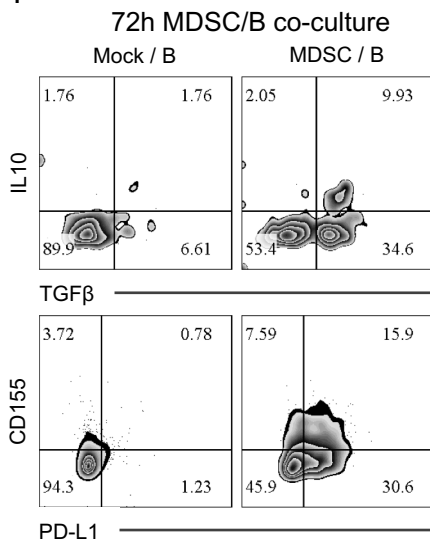

**G**

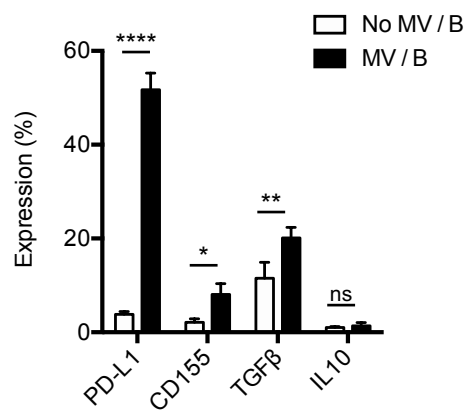

**Supplementary Figure 5**

**A**

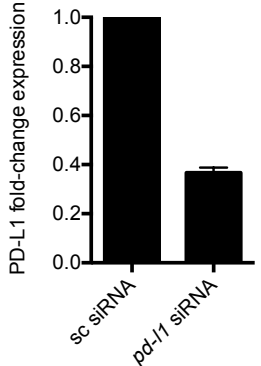

**B**

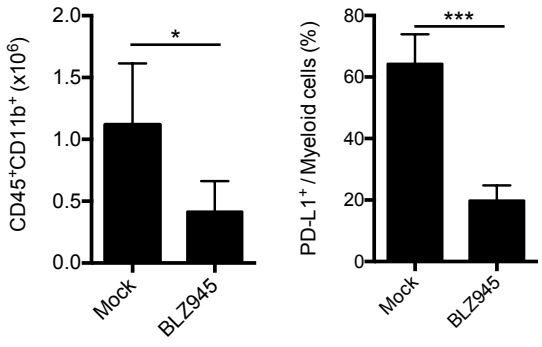

**C**

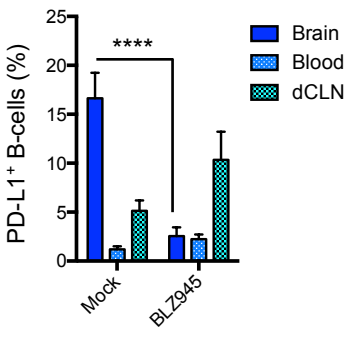

**D**

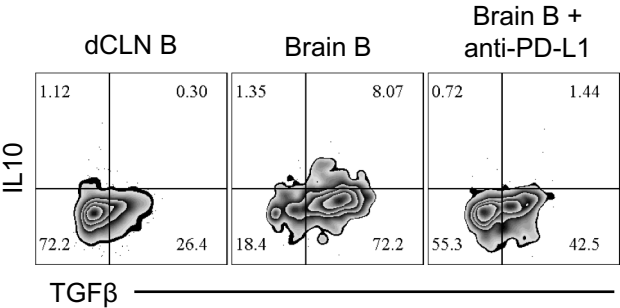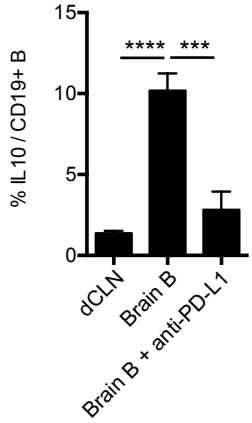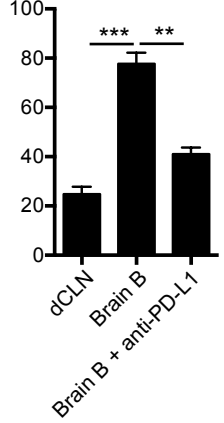

# Supplementary Figure 6

A

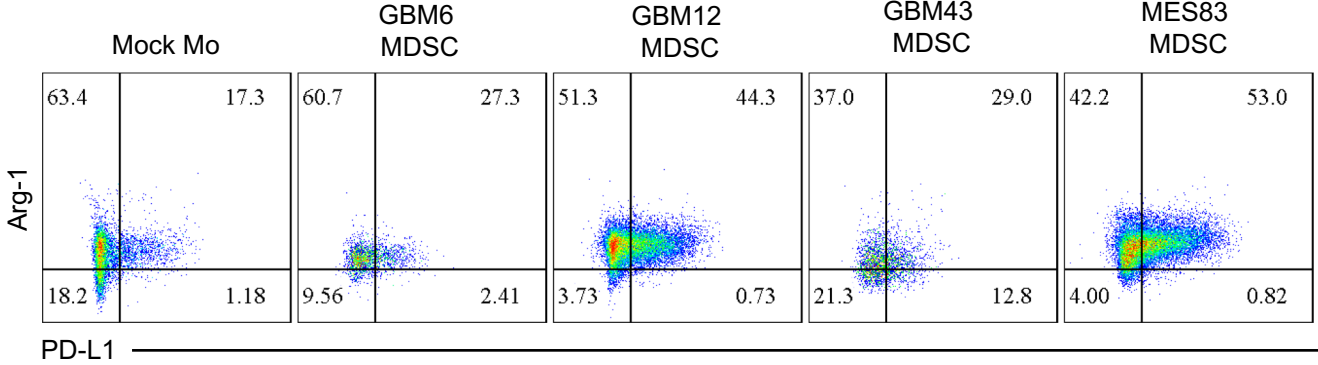

B

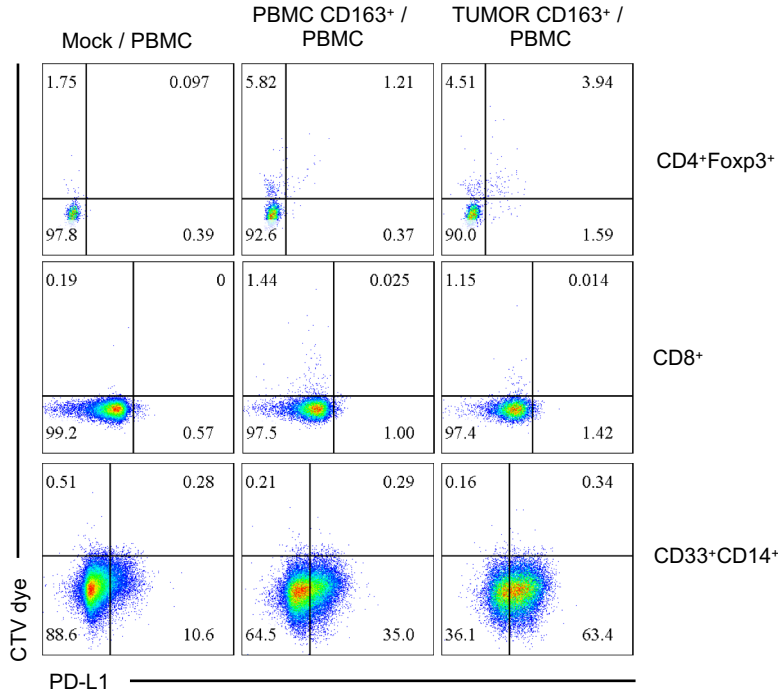

Supplement: NIHMS1540348-supplement-2.pdf [file NIHMS1540348-supplement-2.pdf]
